# Supplementary material for: Quantifying Human Avoidance Behavior in Immersive Virtual Reality
Source: Front Behav Neurosci. 2020 Sep 30;14:569899. doi: 10.3389/fnbeh.2020.569899 (PMC7554565; doi:10.3389/fnbeh.2020.569899)
Supplement: Supplementary Data Sheet — Unity package containing the virtual scenes. [file Data_Sheet_4.ZIP]

Archive with 1 entries (1 files):
- QHAB.unitypackage
